# Supplementary material for: Non-SMC condensin I complex subunit H mediates mature chromosome condensation and DNA damage in pancreatic cancer cells
Source: PubMed Central journal article supplement (PMC6884527; doi:10.1038/s41598-019-54478-3), 2019-11-29
Supplement: 41598_2019_54478_MOESM1_ESM.pdf [file 41598_2019_54478_MOESM1_ESM.pdf]

**Non-SMC condensin I complex subunit H mediates  
mature chromosome condensation and DNA damage  
in pancreatic cancer cells**

Jae Hyoeng Kim<sup>1\*</sup>, Yuna Youn<sup>1</sup>, Kyung-Tae Kim<sup>2</sup>, Jang Gyubeom<sup>2</sup>, Jin-Hyeok Hwang<sup>1,3\*</sup>

<sup>1</sup> Department of Internal Medicine, Seoul National University Bundang Hospital, Seongnam-si, Gyeonggi-do, 13620, Republic of Korea

<sup>2</sup> Research Institute, National Cancer Center, Goyang-si, Gyeonggi-do, 10408, Republic of Korea

<sup>3</sup> Department of Internal Medicine, Seoul National University College of Medicine, Seoul, 03080, Republic of Korea

A

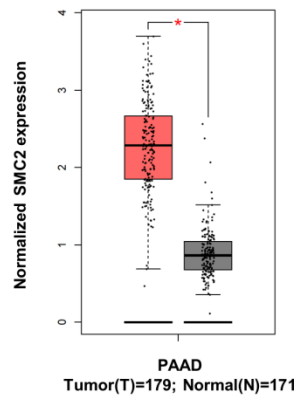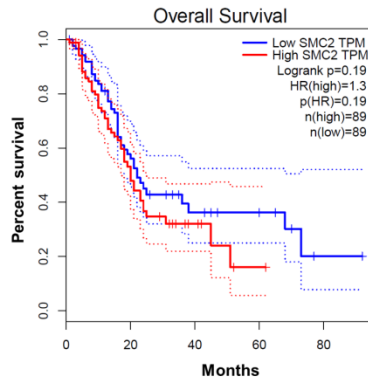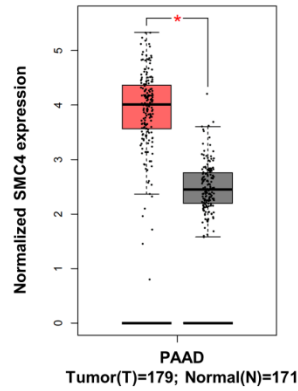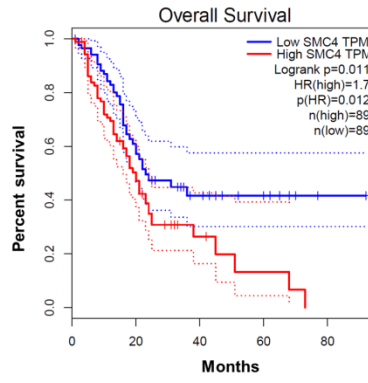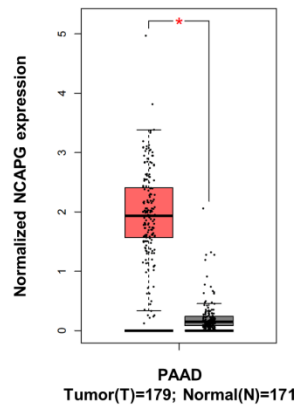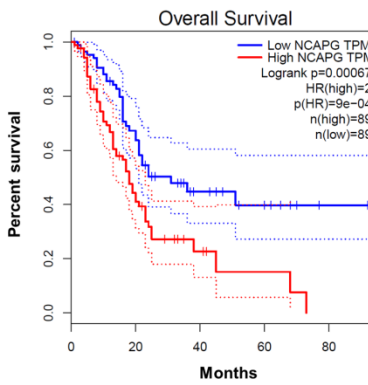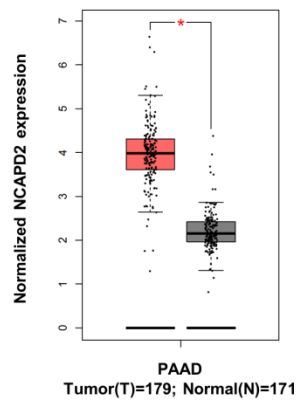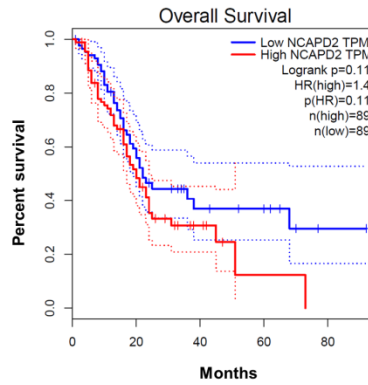

**A**

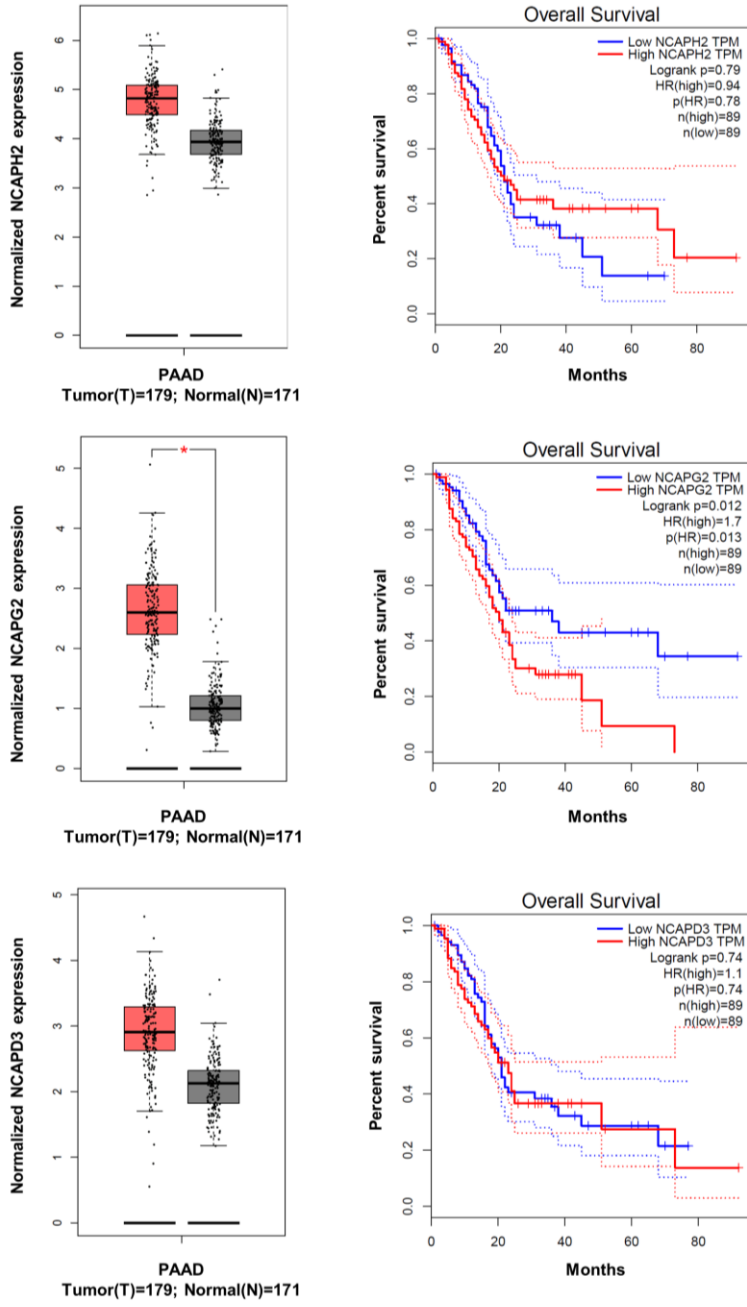

**B**

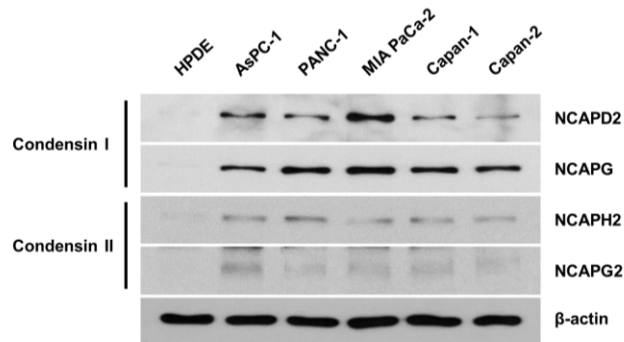

**Supplementary Figure 1. Expression of condensin I and II subunits in PC tissues and overall survival based on GEPIA data.** **A**, Expression levels of subunits of condensin I and II subunits in PC tissues ( $n = 179$ ) and normal tissues ( $n = 171$ ) and overall survival (OS) based on the TCGA database were analyzed. Each dot represents sample expression. OS of patients with low or high expression levels of subunits of condensin I and II complexes was analyzed by the Kaplan–Meier method and log rank tests (PAAD: pancreas adenocarcinoma).  $*P < 0.005$ . **B**, NCAPD2, NCAPG, NCAPH2 and NCAPG2 protein expressions were analyzed by western blotting in human pancreatic duct epithelial (HPDE) cells and different PC cell lines (AsPC-1, PANC-1, MIA PaCa-2, Capan-1, and Capan-2 cells). Cell lysates were immunoblotted with the indicated antibodies.

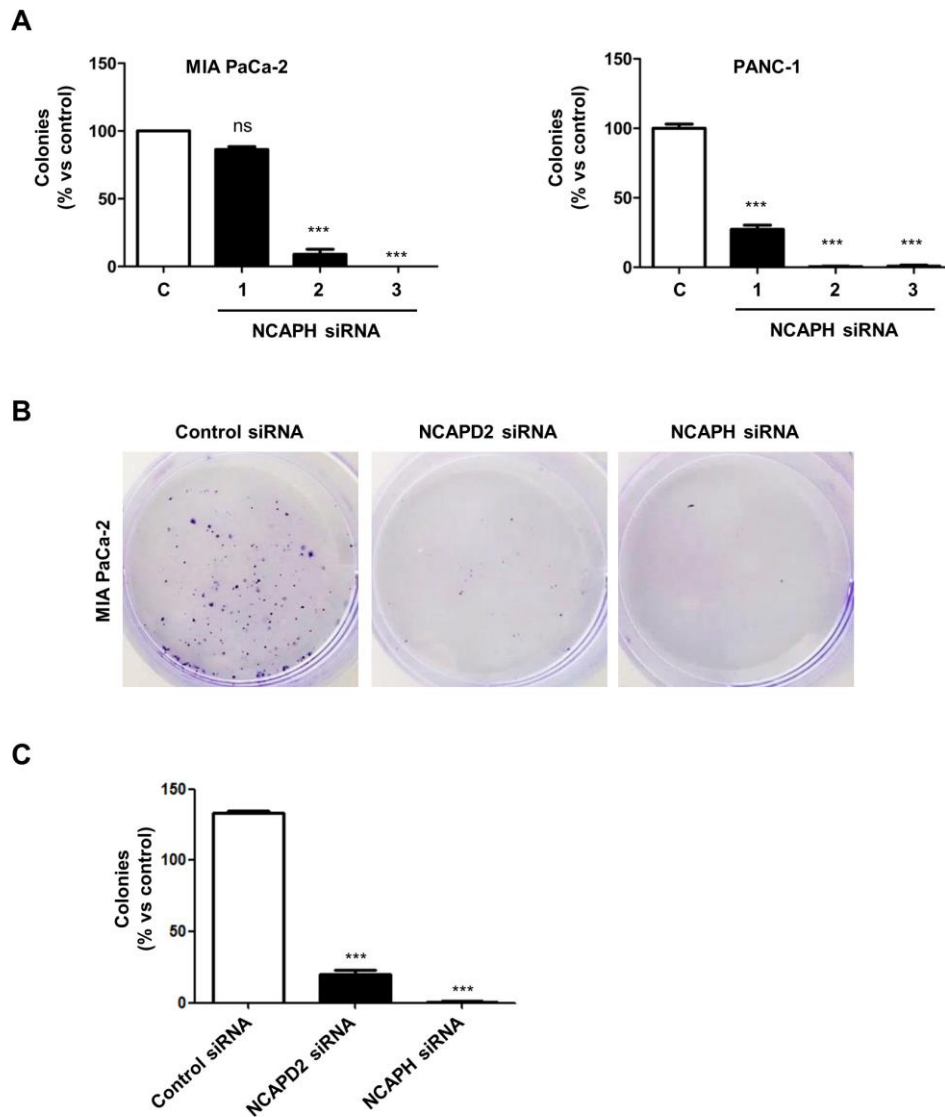

**Supplementary Figure 2. NCAPH- or NCAPD2-knockdown PC cells inhibit colony formation.** **A**, The colonies of Figure 2B were counted. **B and C**, The colonies were imaged and counted. Values represent means  $\pm$  SEMs. \*\*\* $P < 0.0001$ . Statistical analysis was performed using one-way analysis of variance followed by Bonferroni's multiple comparison tests.

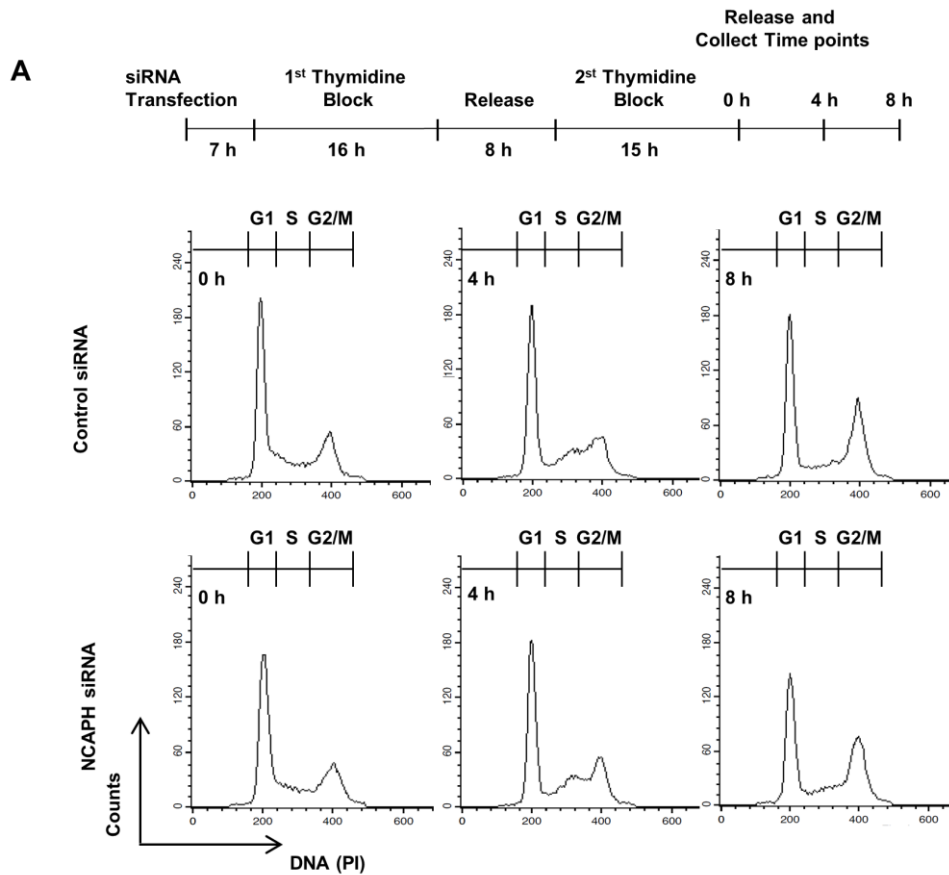

**Supplementary Figure 3. Knockdown of NCAPH in HPDE cells does not affect cell cycle processes.** A, HPDE cells were transfected with the indicated siRNAs, and after release from the second thymidine block, cells were assayed at different time points ranging from 0 to 8 h. The HPDE cells were harvested for propidium iodide (PI) staining and analyzed by flow cytometry to determine the cell cycle fraction at 0, 4, and 8 h after release.

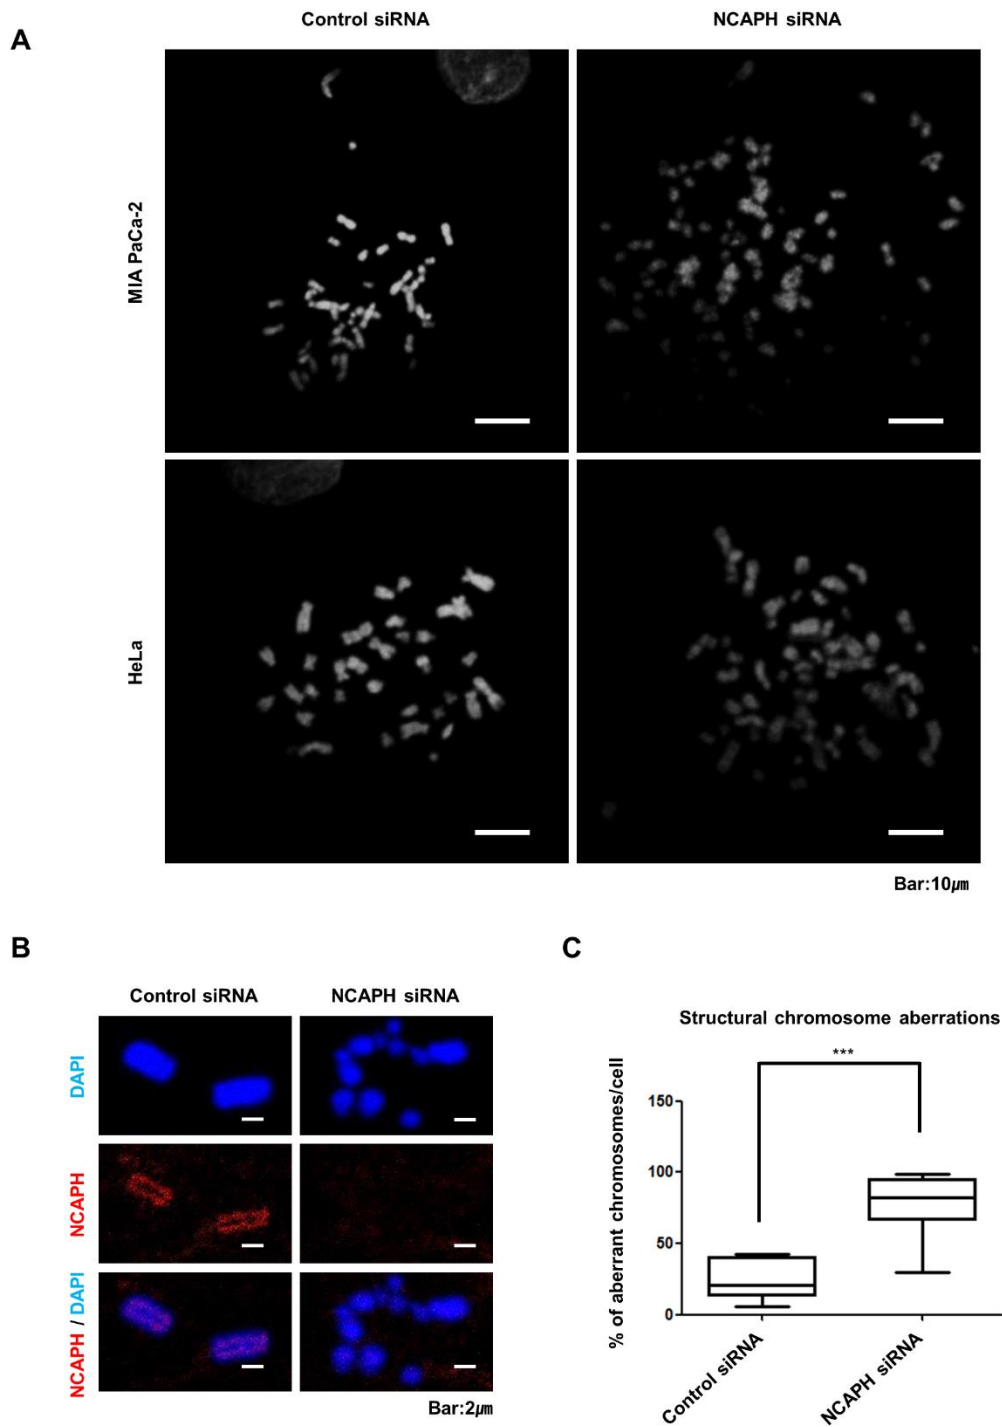

**Supplementary Figure 4. Confirmation of chromosome morphology by NCAPH knockdown in MIA PaCa-2 and HeLa cells.** A, MIA PaCa-2 and HeLa cells were transfected with control siRNA or NCAPH siRNA and arrested at metaphase by colcemid

treatment for 4 h. DNA was stained using DAPI (grey). Individual chromosomes: Scale bar, 10  $\mu\text{m}$ . **B**, The control- or NCAPH-knockdown cells (MIA PaCa-2) were spread onto slides, extracted, fixed, and stained with anti-NCAPH antibodies (red). DNA was stained using DAPI (blue). Individual chromosomes: Scale bar, 2  $\mu\text{m}$ . **C**, Frequency of abnormal chromosome morphology in control- and NCAPH-knockdown cells. For accurate quantification, more than 800 chromosomes (more than 10 cells) captured in at least three different fields were analyzed. Values represent means  $\pm$  SEMs. \*\*\* $P < 0.0001$ , two-way analysis of variance.



**Figure 1. B**

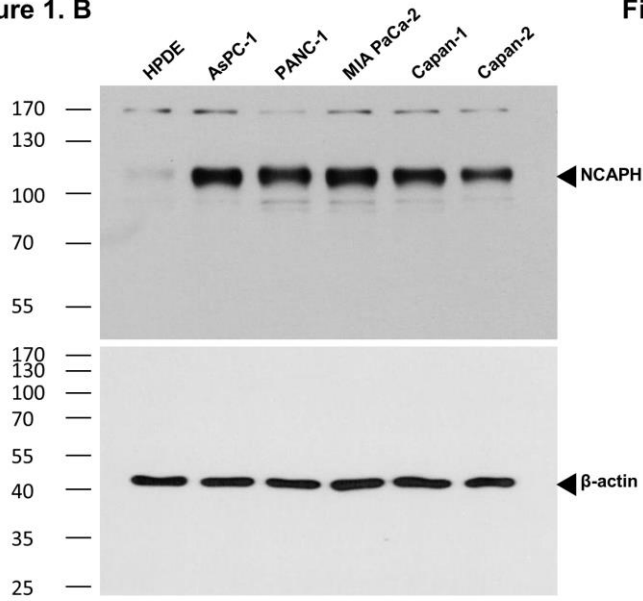

**Figure 2. A**

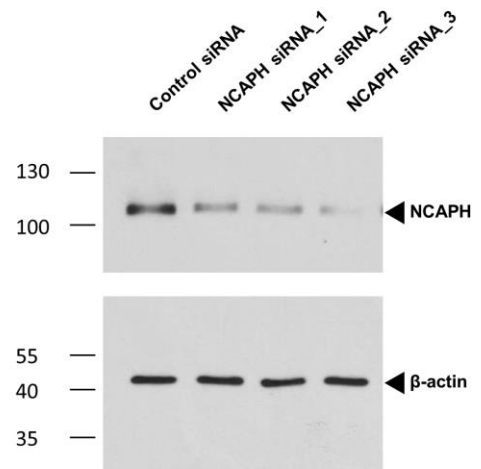

**Figure 3. C**

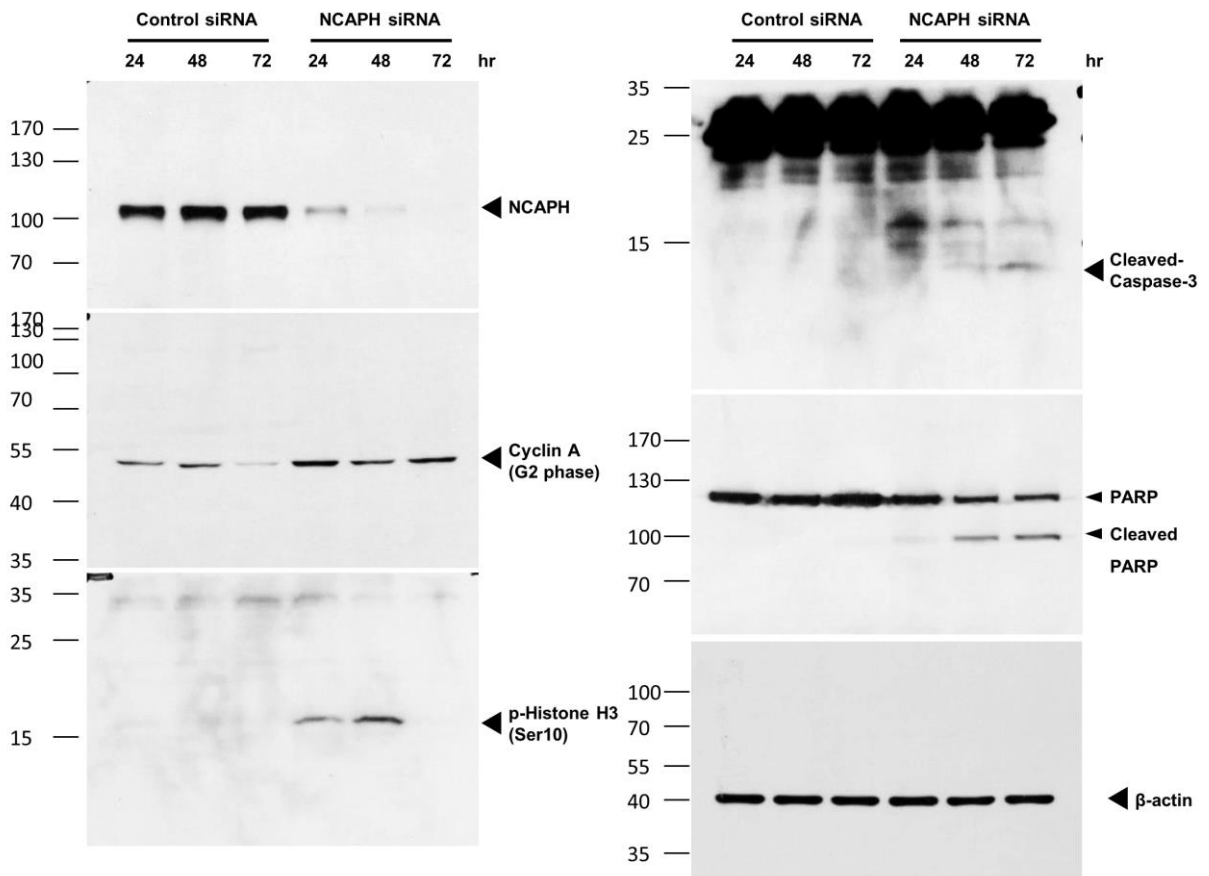

**Supplementary Figure 5. Full-length immunoblots.**

Figure 3. E

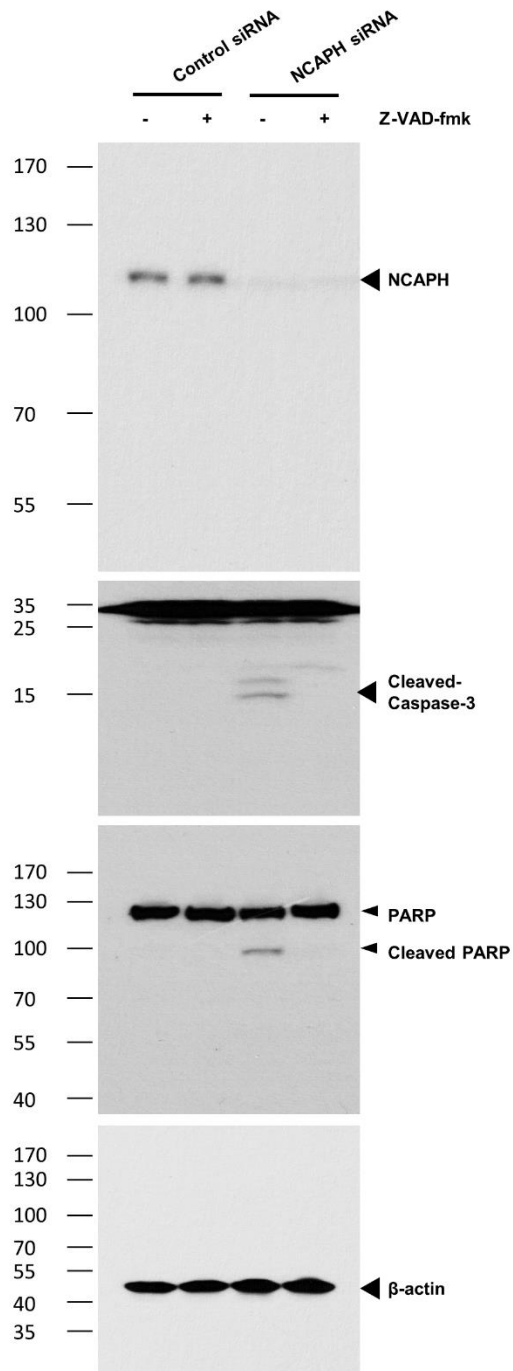

Figure 5. C

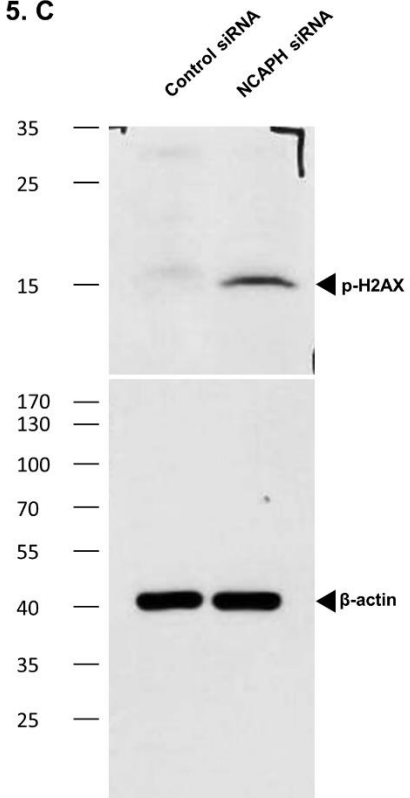

Supplementary Figure 5. Continued

**Figure 5. F**

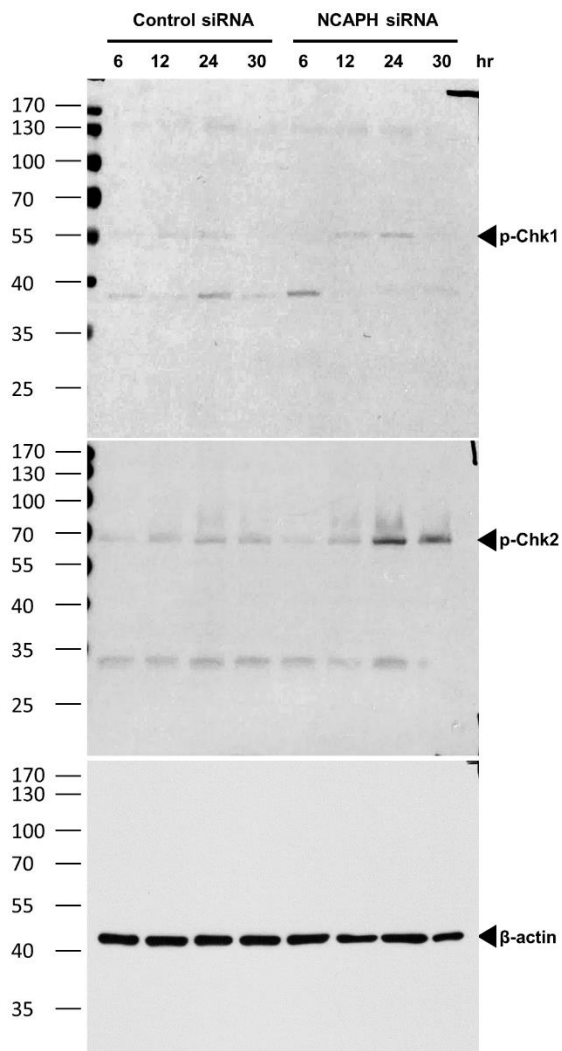

**Supplementary Figure 5. Continued**

Supplementary Figure 1. B

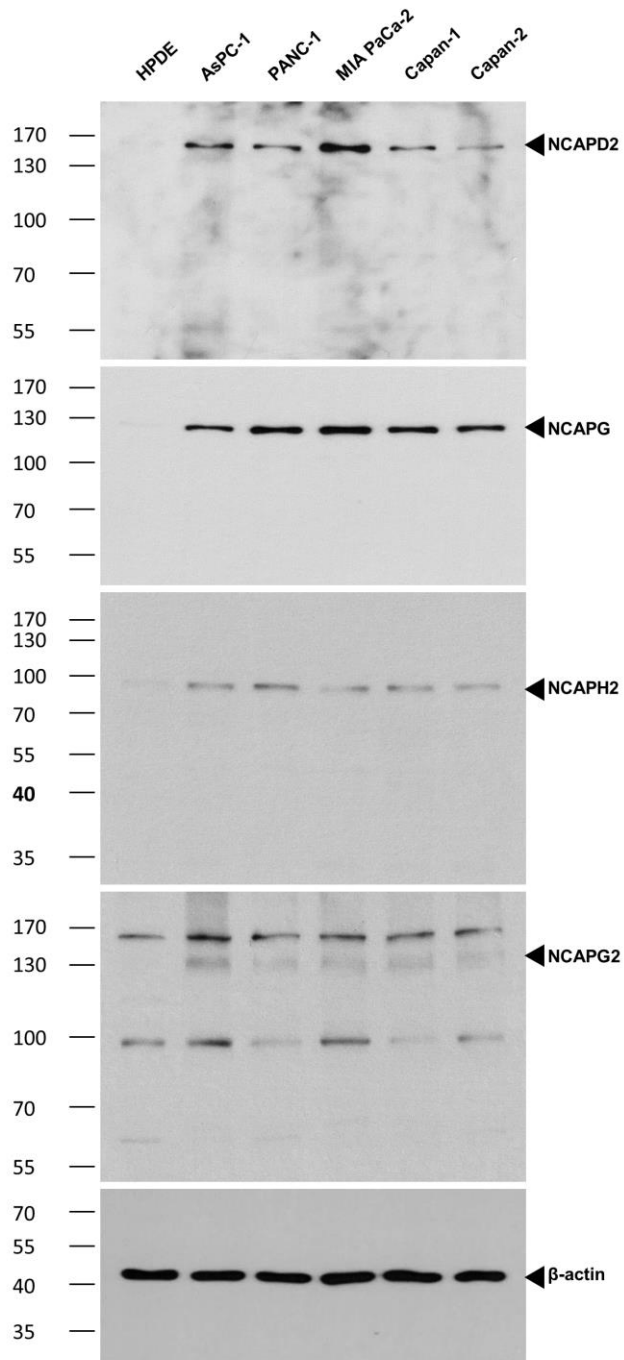

Supplementary Figure 5. Continued
